# Supplementary material for: Lead-free, formamidinium germanium-antimony halide (FA4GeSbCl12) double perovskite solar cells: the effects of band offsets
Source: Royal Society of Chemistry journal article supplement (doi:10.1039/d3ra03102k), 2023-01-01
Supplement: d3ra03102k1.pdf [file d3ra03102k1.pdf]

## Supporting Information

### Lead-free, formamidinium germanium-antimony halide (FA<sub>4</sub>GeSbCl<sub>12</sub>) double perovskite solar cells: effect of band offsets

Karthick Sekar,<sup>a,b,\*</sup> Latha Marasamy,<sup>c</sup> Sasikumar Mayarambakam,<sup>d,\*</sup> Hesham Hawashin,<sup>a</sup> Mohamad Nour,<sup>b</sup> Johann Bouclé<sup>a</sup>

(a) Univ. Limoges, CNRS, XLIM, UMR 7252, F-87000, Limoges, France.

(b) GREMAN UMR 7347, Université de Tours, CNRS, INSA Centre Val de Loire, 37071 Tours, France.

(c) Facultad de Química, Materiales-Energía, Universidad Autónoma de Querétaro, Santiago de Querétaro, Querétaro, C.P. 76010, Mexico.

(d) Department of Chemistry, Indian Institute of Science Education and Research (IISER)-Tirupati, Tirupati, 517507, A.P., India.

**Table S1.** SCAPS-1D input parameters of FTO, TiO<sub>2</sub>, FA<sub>4</sub>GeSbCl<sub>12</sub> and Cu<sub>2</sub>O.

| Parameters                                                                        | FTO<br>(TCO)         | TiO <sub>2</sub><br>(ETL) | FA <sub>4</sub> GeSbCl <sub>12</sub><br>(Absorber) | Cu <sub>2</sub> O<br>(HTL) |
|-----------------------------------------------------------------------------------|----------------------|---------------------------|----------------------------------------------------|----------------------------|
| Thickness (nm)                                                                    | 500                  | 30                        | 300                                                | 100                        |
| Bandgap, E <sub>g</sub> (eV)                                                      | 3.50                 | 3.20                      | 1.3                                                | 2.17                       |
| Affinity, $\chi$ (eV)                                                             | 4.00                 | 3.9                       | 3.50                                               | 3.2                        |
| Permittivity, $\epsilon_r$                                                        | 9.00                 | 9.00                      | 2.59                                               | 7.11                       |
| Effective density of states at CB, $N_c$ (cm <sup>-3</sup> )                      | 2.2×10 <sup>18</sup> | 2.2×10 <sup>18</sup>      | 2.2×10 <sup>18</sup>                               | 2.02×10 <sup>17</sup>      |
| Effective density of states at VB, $N_v$ (cm <sup>-3</sup> )                      | 1.8×10 <sup>19</sup> | 1.8×10 <sup>19</sup>      | 2.0×10 <sup>18</sup>                               | 1.1×10 <sup>19</sup>       |
| Mobility of electrons, $\mu_n$ (cm <sup>2</sup> V <sup>-1</sup> s <sup>-1</sup> ) | 20                   | 20                        | 2268                                               | 200                        |
| Mobility of holes, $\mu_p$ (cm <sup>2</sup> V <sup>-1</sup> s <sup>-1</sup> )     | 10                   | 10                        | 478                                                | 80                         |
| Density of n-type doping, $N_D$ (cm <sup>-3</sup> )                               | 1.0×10 <sup>18</sup> | 1.0×10 <sup>19</sup>      | 0                                                  | 0                          |
| Density of p-type doping, $N_A$ (cm <sup>-3</sup> )                               | 0                    | 1                         | 1.0×10 <sup>15</sup>                               | 1.0×10 <sup>18</sup>       |
| Density of defects, $N_t$ (cm <sup>-3</sup> )                                     | 1.0×10 <sup>15</sup> | 1.0×10 <sup>15</sup>      | 1.0×10 <sup>16</sup>                               | 1.0×10 <sup>15</sup>       |
| Reference                                                                         | 1                    | 2,3                       | 4,5                                                | 2,6                        |

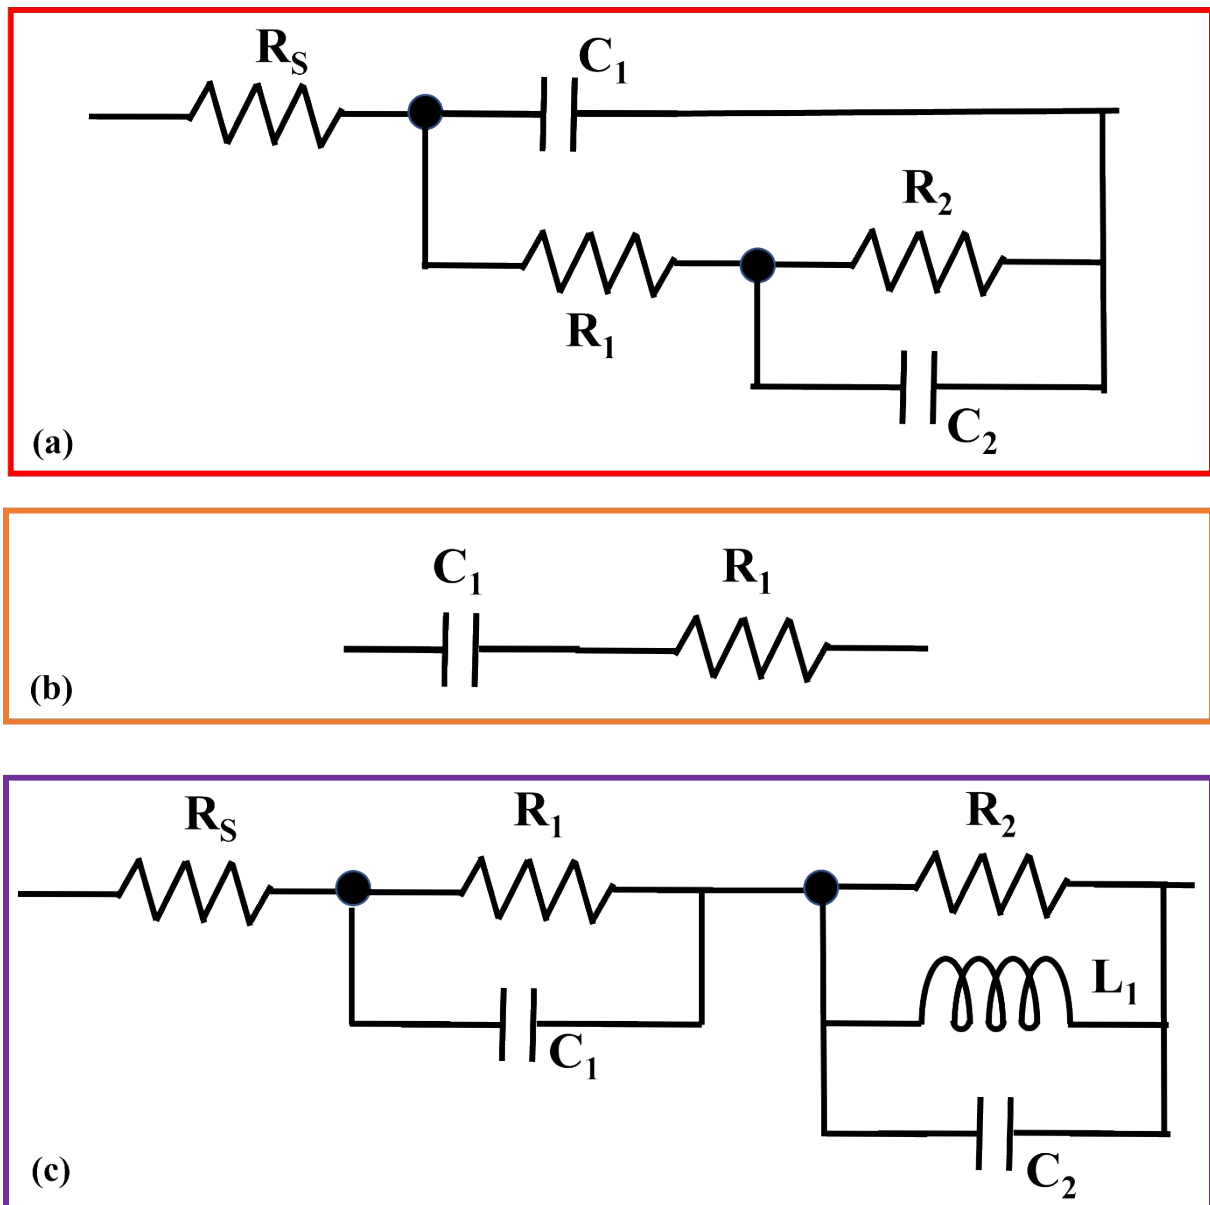

**Figure S1.** Equivalent circuit for Nyquist plots of EIS spectra with respect to the SCAPS-1D impedance data under AM 1.5 spectrum. (a) CBO (- 0.4 eV, 0 eV, + 0.2 eV), VBO (+ 0.57 eV),  $N_t$  ( $1E14 \text{ cm}^{-3}$ ,  $1E18 \text{ cm}^{-3}$ ,  $1E20 \text{ cm}^{-3}$ ) and absorber thickness (200 nm), (b) VBO (- 0.4 eV and 0 eV), and (c) absorber thickness (1000 nm and 3000 nm), 1000 nm (0 V, 0.3 eV, 0.6 eV), Series resistance ( $0.2 \text{ } \Omega \cdot \text{cm}^2$ ,  $1.4 \text{ } \Omega \cdot \text{cm}^2$ ,  $2.5 \text{ } \Omega \cdot \text{cm}^2$ ) and Shunt resistance ( $1\text{k } \Omega \cdot \text{cm}^2$ ,  $50\text{k } \Omega \cdot \text{cm}^2$ ,  $200\text{k } \Omega \cdot \text{cm}^2$ ), respectively.

**Table S2.** Fitted results from the Nyquist Plot of simulated solar cell with different selected parameters (CBO, VBO,  $N_t$ , absorber thickness, bias voltage, series and shunt resistances).

|                                                                |              | <b>Rs</b><br><b><math>\Omega.cm^2</math></b> | <b>L</b> | <b>R</b><br><b><math>\Omega.cm^2</math></b><br><b>(HF)</b> | <b>CPE or C</b><br><b>F/cm<sup>2</sup></b><br><b>(HF)</b> | <b>R</b><br><b><math>\Omega.cm^2</math></b><br><b>(LF)</b> | <b>CPE or C</b><br><b>F/cm<sup>2</sup></b><br><b>(LF)</b> | <b>tau</b><br><b>(LF)</b> |
|----------------------------------------------------------------|--------------|----------------------------------------------|----------|------------------------------------------------------------|-----------------------------------------------------------|------------------------------------------------------------|-----------------------------------------------------------|---------------------------|
| <b>CBO</b><br><b>(eV)</b>                                      | <b>- 0.4</b> | 0.004                                        |          | 451                                                        | 6.403E-9                                                  | 228                                                        | 1.341E-5                                                  | 0.0031                    |
|                                                                | <b>0</b>     | 0.004                                        |          | 617                                                        | 6.570E-9                                                  | 9552                                                       | 3.512E-6                                                  | 0.0336                    |
|                                                                | <b>+ 0.2</b> | 0.004                                        |          | 739                                                        | 6.566E-9                                                  | 37041                                                      | 2.812E-6                                                  | 0.1042                    |
| <b>VBO</b><br><b>(eV)</b>                                      | <b>- 0.4</b> |                                              |          |                                                            |                                                           | 0.0195                                                     | 2.751E-5                                                  | 5.3745E-7                 |
|                                                                | <b>0</b>     |                                              |          |                                                            |                                                           | 0.014                                                      | 3.346E-5                                                  | 4.6840E-7                 |
|                                                                | <b>+0.57</b> | 0.045                                        |          | 618                                                        | 6.562E-9                                                  | 9554                                                       | 3.512E-6                                                  | 0.0336                    |
| <b>Nt</b><br><b>(cm<sup>-3</sup>)</b>                          | <b>E14</b>   | 0.066                                        |          | 53.45                                                      | 6.606E-9                                                  | 10100                                                      | 4.406E-6                                                  | 0.0445                    |
|                                                                | <b>E18</b>   | 0.044                                        |          | 53.31                                                      | 6.604E-9                                                  | 4889                                                       | 4.437E-6                                                  | 0.0217                    |
|                                                                | <b>E20</b>   | 0.044                                        |          | 40                                                         | 6.557E-9                                                  | 85.71                                                      | 8.531E-6                                                  | 7.3115E-4                 |
| <b>Absorber</b><br><b>Thickness</b><br><b>(nm)</b>             | <b>200</b>   | 0.051                                        |          | 20                                                         | 9.85E-9                                                   | 9172                                                       | 1.196E-5                                                  | 0.1097                    |
|                                                                | <b>1000</b>  | 0.041                                        | 0.478    | 11006                                                      | 4.32E-9                                                   | 2035                                                       | 1.718E-8                                                  | 3.4969E-5                 |
|                                                                | <b>3000</b>  | 0.046                                        | 0.505    | 10327                                                      | 4.39E-9                                                   | 2131                                                       | 1.722E-8                                                  | 3.6706E-5                 |
| <b>1000</b><br><b>(nm)</b>                                     | <b>0 V</b>   | 0.041                                        | 0.478    | 11006                                                      | 4.32E-9                                                   | 2035                                                       | 1.718E-8                                                  | 3.4969E-5                 |
|                                                                | <b>0.3 V</b> | 0.041                                        | 0.333    | 6738                                                       | 5.42E-9                                                   | 1525                                                       | 1.872E-8                                                  | 2.8552E-5                 |
|                                                                | <b>0.6 V</b> | 0.039                                        | 0.018    | 372                                                        | 7.46E-9                                                   | 99.63                                                      | 2.948E-8                                                  | 2.9371E-6                 |
| <b>R<sub>series</sub></b><br><b>(<math>\Omega.cm^2</math>)</b> | <b>0.2</b>   | 0.241                                        | 0.477    | 11006                                                      | 4.315E-9                                                  | 2031                                                       | 1.726E-8                                                  | 3.5053E-5                 |
|                                                                | <b>1.4</b>   | 1.442                                        | 0.477    | 11005                                                      | 4.313E-9                                                  | 2029                                                       | 1.730E-8                                                  | 3.5104E-5                 |
|                                                                | <b>2.5</b>   | 2.543                                        | 0.473    | 11004                                                      | 4.273E-9                                                  | 1996                                                       | 1.797E-8                                                  | 3.5878E-5                 |
| <b>R<sub>shunt</sub></b><br><b>(<math>\Omega.cm^2</math>)</b>  | <b>1k</b>    | 0.044                                        | 0.0026   | 917                                                        | 3.498E-9                                                  | 10.93                                                      | 2.716E-7                                                  | 2.9688E-6                 |
|                                                                | <b>50k</b>   | 0.044                                        | 0.3000   | 9029                                                       | 4.074E-9                                                  | 1276                                                       | 2.267E-8                                                  | 2.8924E-5                 |
|                                                                | <b>200k</b>  | 0.041                                        | 0.4217   | 10419                                                      | 4.145E-9                                                  | 1724                                                       | 2.063E-8                                                  | 3.5571E-5                 |

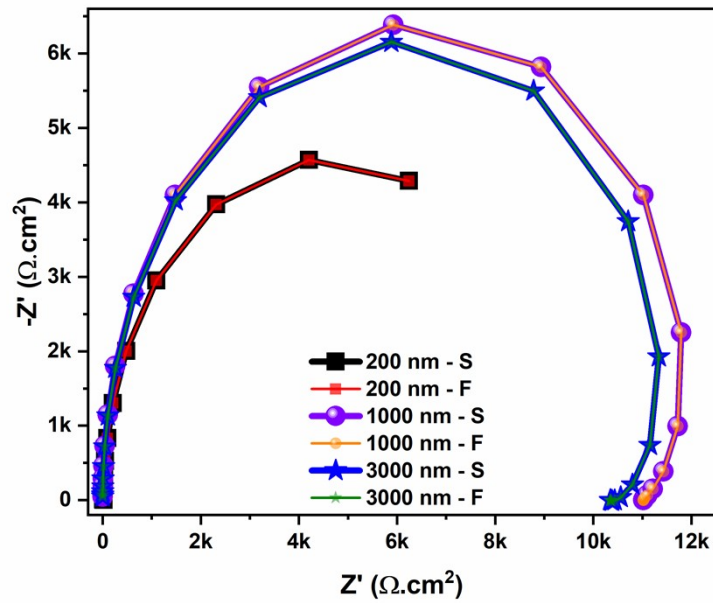

**Figure S2.** Nyquist plots as a function of absorber thicknesses. Note: S signifies the SCAPS impedance data, and F denotes fitted data.

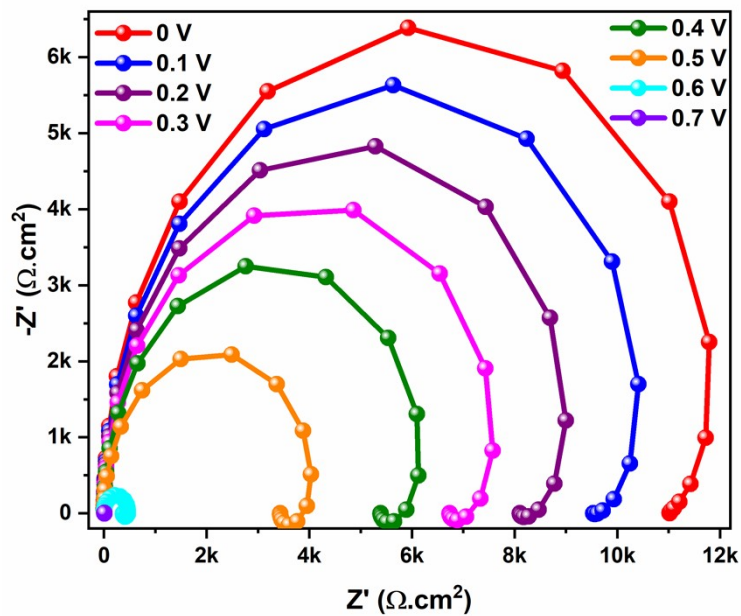

**Figure S3.** Nyquist plots of solar cell with 1000nm absorber thickness measured at different bias voltage from 0 to 0.7 V.

**Table S3.** SCAPS-1D input parameters of FTO, TiO<sub>2</sub>, en-FASnI<sub>3</sub> and PTAA.

| <b>Parameters</b>                                                                             | <b>FTO<br/>(TCO)</b> | <b>TiO<sub>2</sub><br/>(ETL)</b> | <b>en-FASnI<sub>3</sub><br/>(Absorber)</b> | <b>PTAA<br/>(HTL)</b> |
|-----------------------------------------------------------------------------------------------|----------------------|----------------------------------|--------------------------------------------|-----------------------|
| <b>Thickness (nm)</b>                                                                         | 500                  | 30                               | 300                                        | 100                   |
| <b>Bandgap, E<sub>g</sub> (eV)</b>                                                            | 3.50                 | 3.20                             | 1.9                                        | 2.96                  |
| <b>Affinity, <math>\chi</math> (eV)</b>                                                       | 4.00                 | 3.9                              | 3.520                                      | 2.3                   |
| <b>Permittivity, <math>\epsilon_r</math></b>                                                  | 9.00                 | 9.00                             | 8.20                                       | 9                     |
| <b>Effective density of states at CB, <math>N_c</math> (cm<sup>-3</sup>)</b>                  | 2.2×10 <sup>18</sup> | 2.2×10 <sup>18</sup>             | 2.2×10 <sup>18</sup>                       | 2.0×10 <sup>21</sup>  |
| <b>Effective density of states at VB, <math>N_v</math> (cm<sup>-3</sup>)</b>                  | 1.8×10 <sup>19</sup> | 1.8×10 <sup>19</sup>             | 2.0×10 <sup>18</sup>                       | 2.0×10 <sup>21</sup>  |
| <b>Mobility of electrons, <math>\mu_n</math> (cm<sup>2</sup>V<sup>-1</sup>s<sup>-1</sup>)</b> | 20                   | 20                               | 22                                         | 1                     |
| <b>Mobility of holes, <math>\mu_p</math> (cm<sup>2</sup>V<sup>-1</sup>s<sup>-1</sup>)</b>     | 10                   | 10                               | 22                                         | 40                    |
| <b>Density of n-type doping, <math>N_D</math> (cm<sup>-3</sup>)</b>                           | 1.0×10 <sup>18</sup> | 1.0×10 <sup>19</sup>             | 0                                          | 0                     |
| <b>Density of p-type doping, <math>N_A</math> (cm<sup>-3</sup>)</b>                           | 0                    | 1                                | 7.0×10 <sup>16</sup>                       | 1.0×10 <sup>18</sup>  |
| <b>Density of defects, <math>N_t</math> (cm<sup>-3</sup>)</b>                                 | 1.0×10 <sup>15</sup> | 1.0×10 <sup>15</sup>             | 2.0×10 <sup>15</sup>                       | 1.0×10 <sup>15</sup>  |
| <b>Reference</b>                                                                              | 1                    | 2,3                              | 7-9                                        | 6,9                   |

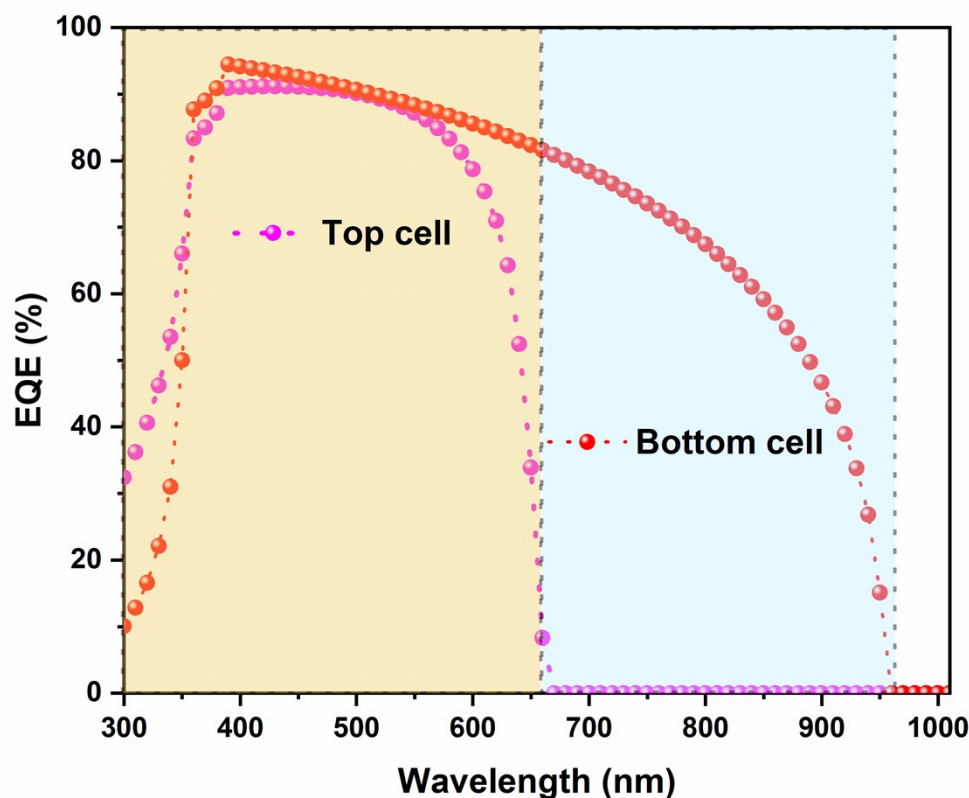

**Figure S4.** EQE of top and bottom cells.

### References

- 1 S. Karthick, S. Velumani and J. Bouclé, *Sol. Energy*, , DOI:10.1016/j.solener.2020.05.041.
- 2 A. A. Kanoun, M. B. Kanoun, A. E. Merad and S. Goumri-Said, *Sol. Energy*, 2019, **182**, 237–244.
- 3 A. U. Duha and M. F. Borunda, *Opt. Mater. (Amst)*., 2022, **123**, 111891.
- 4 C. Walkons, R. Murshed and S. Bansal, *Sol. RRL*, 2020, **4**, 2000299.
- 5 W. B. Dai, S. Xu, J. Zhou, J. Hu, K. Huang and M. Xu, *Sol. Energy Mater. Sol. Cells*, 2019, **192**, 140–146.
- 6 S. Karthick, J. Bouclé and S. Velumani, *Sol. Energy*, 2021, **218**, 157–168.
- 7 W. Ke, C. C. Stoumpos, M. Zhu, L. Mao, I. Spanopoulos, J. Liu, O. Y. Kontsevoi, M. Chen, D. Sarma, Y. Zhang, M. R. Wasielewski and M. G. Kanatzidis, *Sci. Adv.*, , DOI:10.1126/sciadv.1701293.
- 8 S. Abdelaziz, A. Zekry, A. Shaker and M. Abouelatta, *Opt. Mater. (Amst)*., , DOI:10.1016/j.optmat.2020.109738.
- 9 T. Yokoyama, Y. Nishitani, Y. Miyamoto, S. Kusumoto, R. Uchida, T. Matsui, K. Kawano, T. Sekiguchi and Y. Kaneko, *ACS Appl. Mater. Interfaces*, 2020, **12**, 27131–27139.
